# Supplementary material
Source: PubMed Central journal article supplement (PMC4284118)
Supplement: supp_mcu233_aob-14436-s01.pdf [file supp_mcu233_aob-14436-s01.pdf]

## SUPPLEMENTARY DATA

Table S1. Linear mixed-model with  $I_{\max}$  and  $K_m$  for ammonium and nitrate as response variables, and the first axis of the PCA and site (considered as a random factor) as explanatory variables.

|                                                                | <i>F</i> -value | d.f. | <i>P</i> -value |
|----------------------------------------------------------------|-----------------|------|-----------------|
| NH <sub>4</sub> <sup>+</sup> $I_{\max}$ ~ PCA axis 1 +Site (r) | 12.40           | 75   | <0.001          |
| NO <sub>3</sub> <sup>-</sup> $I_{\max}$ ~ PCA axis 1 +Site (r) | 21.55           | 75   | <0.001          |
| NH <sub>4</sub> <sup>+</sup> $K_m$ ~ PCA axis 1 +Site (r)      | 19.30           | 75   | <0.001          |
| NO <sub>3</sub> <sup>-</sup> $K_m$ ~ PCA axis 1 +Site (r)      | 78.43           | 75   | >0.001          |

Table S2: Loadings scores along the two first axis of the PCA for leaf and root traits (Fig. 2).

|                    | Axis 1 | Axis 2 |
|--------------------|--------|--------|
| SLA                | 0.46   | 0.31   |
| LDMC               | -0.44  | -0.30  |
| N <sub>shoot</sub> | 0.52   | 0.03   |
| SRL                | 0.09   | -0.54  |
| RDMC               | -0.41  | 0.12   |
| N <sub>root</sub>  | 0.38   | -0.45  |
| srr                | 0.05   | -0.55  |
